# Supplementary material
Source: PubMed Central journal article supplement (PMC10394114)

## Supplementary Materials for

### Longitudinal changes in brain metabolites in healthy controls and patients with first episode psychosis: a 7-Tesla MRS study

Min Wang<sup>1,2</sup>, Ph.D.; Peter B. Barker<sup>1,3,#</sup>, D.Phil.; Nicola G. Cascella<sup>4</sup>, M.D.; Jennifer M. Coughlin<sup>4</sup>, M.D.; Gerald Nestadt<sup>4</sup>, M.D.; Frederick C. Nucifora Jr<sup>4</sup>, D.O., Ph.D.; Thomas W. Sedlak<sup>4</sup>, M.D., Ph.D.; Alexandra Kelly<sup>4</sup>, B.S.; Laurent Younes<sup>5</sup>, Ph.D.; Donald Geman<sup>5</sup>, Ph.D.; Lena Palaniyappan<sup>6,7,8</sup>, M.D., Ph.D.; Akira Sawa<sup>4,9,10,11,12,13,#</sup>, M.D.; and Kun Yang<sup>4,#</sup>, Ph.D.

<sup>1</sup>Russell H Morgan Department of Radiology and Radiological Science, Johns Hopkins University School of Medicine, Baltimore, MD, USA.

<sup>2</sup>College of Biomedical Engineering and Instrument Science, Zhejiang University, China.

<sup>3</sup>F. M. Kirby Research Center for Functional Brain Imaging, Kennedy Krieger Institute, Baltimore, MD, USA.

<sup>4</sup>Department of Psychiatry and Behavioral Sciences, Johns Hopkins University School of Medicine, Baltimore, MD, USA.

<sup>5</sup>Department of Applied Mathematics and Statistics, Johns Hopkins University, Baltimore, MD, USA.

<sup>6</sup>Robarts Research Institution, University of Western Ontario, London, ON, Canada.

<sup>7</sup>Department of Psychiatry, University of Western Ontario, London, ON, Canada.

<sup>8</sup>Douglas Mental Health University Institute, Department of Psychiatry, McGill University, Montreal, QC, Canada.

<sup>9</sup>Department of Neuroscience, Johns Hopkins University School of Medicine, Baltimore, MD, USA.

<sup>10</sup>Department of Biomedical Engineering, Johns Hopkins University, Baltimore, MD, USA.

<sup>11</sup>Department of Genetic Medicine, Johns Hopkins University School of Medicine, Baltimore, MD, USA.

<sup>12</sup>Department of Pharmacology and Molecular Sciences, Johns Hopkins University School of Medicine, Baltimore, MD, USA.

<sup>13</sup>Department of Mental Health, Johns Hopkins University Bloomberg School of Public Health, Baltimore, MD, USA.

#### # Authors for Correspondence:

Drs. Akira Sawa, Peter B. Barker, and Kun Yang

[asawa1@jhmi.edu](mailto:asawa1@jhmi.edu)

**Table S1. Sample size for each metabolite in each brain region.**

Abbreviations: GABA,  $\gamma$ -aminobutyric acid; NAA, N-acetylaspartate; NAAG, N-acetylaspartyl glutamate; ACC, anterior cingulate cortex; DLPFC, dorsolateral prefrontal cortex; and OFR, orbital frontal cortex.

| region            | metabolite     | control | patient |
|-------------------|----------------|---------|---------|
| ACC               | Glutathione    | 43      | 31      |
|                   | GABA           | 42      | 33      |
|                   | Glutamate      | 44      | 36      |
|                   | Glutamine      | 43      | 33      |
|                   | total Choline  | 44      | 33      |
|                   | Lactate        | 44      | 30      |
|                   | Myo-inositol   | 45      | 35      |
|                   | NAA            | 47      | 34      |
|                   | NAAG           | 45      | 25      |
|                   | total Creatine | 46      | 35      |
| DLPFC             | Glutathione    | 38      | 29      |
|                   | GABA           | 42      | 30      |
|                   | Glutamate      | 45      | 32      |
|                   | Glutamine      | 41      | 32      |
|                   | total Choline  | 40      | 30      |
|                   | Lactate        | 28      | 19      |
|                   | Myo-inositol   | 43      | 32      |
|                   | NAA            | 43      | 31      |
|                   | NAAG           | 29      | 26      |
|                   | total Creatine | 45      | 31      |
| Thalamus          | Glutathione    | 45      | 34      |
|                   | GABA           | 44      | 34      |
|                   | Glutamate      | 45      | 35      |
|                   | Glutamine      | 42      | 30      |
|                   | total Choline  | 43      | 33      |
|                   | Lactate        | 28      | 29      |
|                   | Myo-inositol   | 45      | 36      |
|                   | NAA            | 44      | 35      |
|                   | NAAG           | 42      | 30      |
|                   | total Creatine | 45      | 34      |
| Centrum semiovale | Glutathione    | 43      | 29      |
|                   | GABA           | 41      | 31      |
|                   | Glutamate      | 46      | 30      |
|                   | Glutamine      | 42      | 29      |
|                   | total Choline  | 44      | 31      |
|                   | Lactate        | 43      | 30      |
|                   | Myo-inositol   | 45      | 32      |
|                   | NAA            | 44      | 31      |
|                   | NAAG           | 43      | 31      |
|                   | total Creatine | 46      | 30      |
| OFR               | Glutathione    | 38      | 25      |
|                   | GABA           | 41      | 25      |
|                   | Glutamate      | 39      | 26      |
|                   | Glutamine      | 37      | 25      |
|                   | total Choline  | 38      | 26      |
|                   | Lactate        | 27      | 17      |
|                   | Myo-inositol   | 41      | 26      |
|                   | NAA            | 39      | 26      |
|                   | NAAG           | 33      | 16      |
|                   | total Creatine | 38      | 26      |

**Table S2. Analysis results for attrition bias in metabolite levels of healthy controls.**

We compared the metabolite levels in 5 brain regions between the full cohort and the longitudinal cohort. There was not a significant difference observed in any metabolite. This suggests that there is not a bias in the neurometabolic profiles of healthy controls that returned for the longitudinal study. Abbreviations: GABA,  $\gamma$ -aminobutyric acid; NAA, N-acetylaspartate; NAAG, N-acetylaspartyl glutamate; ACC, anterior cingulate cortex; DLPFC, dorsolateral prefrontal cortex; and OFR, orbital frontal cortex.

| region   | metabolite     | p-value | q-value |
|----------|----------------|---------|---------|
| ACC      | Glutathione    | 0.52    | 0.97    |
| ACC      | GABA           | 0.78    | 0.97    |
| ACC      | Glutamate      | 0.84    | 0.97    |
| ACC      | Glutamine      | 0.93    | 0.97    |
| ACC      | total Choline  | 0.26    | 0.97    |
| ACC      | Lactate        | 0.69    | 0.97    |
| ACC      | Myo-inositol   | 0.47    | 0.97    |
| ACC      | NAA            | 0.79    | 0.97    |
| ACC      | NAAG           | 0.91    | 0.97    |
| ACC      | total Creatine | 0.55    | 0.97    |
| DLPFC    | Glutathione    | 0.62    | 0.97    |
| DLPFC    | GABA           | 0.81    | 0.97    |
| DLPFC    | Glutamate      | 0.84    | 0.97    |
| DLPFC    | Glutamine      | 0.80    | 0.97    |
| DLPFC    | total Choline  | 0.37    | 0.97    |
| DLPFC    | Lactate        | 0.98    | 0.98    |
| DLPFC    | Myo-inositol   | 0.86    | 0.97    |
| DLPFC    | NAA            | 0.79    | 0.97    |
| DLPFC    | NAAG           | 0.39    | 0.97    |
| DLPFC    | total Creatine | 0.72    | 0.97    |
| Thalamus | Glutathione    | 0.70    | 0.97    |
| Thalamus | GABA           | 0.92    | 0.97    |
| Thalamus | Glutamate      | 0.07    | 0.97    |
| Thalamus | Glutamine      | 0.64    | 0.97    |
| Thalamus | total Choline  | 0.38    | 0.97    |
| Thalamus | Lactate        | 0.97    | 0.98    |
| Thalamus | Myo-inositol   | 0.56    | 0.97    |
| Thalamus | NAA            | 0.67    | 0.97    |
| Thalamus | NAAG           | 0.84    | 0.97    |
| Thalamus | total Creatine | 0.56    | 0.97    |

(continued on next page)

|                   |                |      |      |
|-------------------|----------------|------|------|
| Centrum semiovale | Glutathione    | 0.48 | 0.97 |
| Centrum semiovale | GABA           | 0.85 | 0.97 |
| Centrum semiovale | Glutamate      | 0.58 | 0.97 |
| Centrum semiovale | Glutamine      | 0.75 | 0.97 |
| Centrum semiovale | total Choline  | 0.70 | 0.97 |
| Centrum semiovale | Lactate        | 0.13 | 0.97 |
| Centrum semiovale | Myo-inositol   | 0.64 | 0.97 |
| Centrum semiovale | NAA            | 0.90 | 0.97 |
| Centrum semiovale | NAAG           | 0.92 | 0.97 |
| Centrum semiovale | total Creatine | 0.78 | 0.97 |
| OFR               | Glutathione    | 0.16 | 0.97 |
| OFR               | GABA           | 0.30 | 0.97 |
| OFR               | Glutamate      | 0.76 | 0.97 |
| OFR               | Glutamine      | 0.49 | 0.97 |
| OFR               | total Choline  | 0.75 | 0.97 |
| OFR               | Lactate        | 0.76 | 0.97 |
| OFR               | Myo-inositol   | 0.91 | 0.97 |
| OFR               | NAA            | 0.62 | 0.97 |
| OFR               | NAAG           | 0.89 | 0.97 |
| OFR               | total Creatine | 0.67 | 0.97 |

**Table S3. Analysis results for attrition bias in metabolite levels of first episode psychosis patients.**

We compared the metabolite levels in 5 brain regions between the full cohort and the longitudinal cohort. There was not a significant difference observed in any metabolite. This suggests that there is no bias in the neurometabolic profiles of patients that returned for the longitudinal study. Abbreviations: GABA,  $\gamma$ -aminobutyric acid; NAA, N-acetylaspartate; NAAG, N-acetylaspartyl glutamate; ACC, anterior cingulate cortex; DLPFC, dorsolateral prefrontal cortex; and OFR, orbital frontal cortex.

| region   | metabolite     | p-value | q-value |
|----------|----------------|---------|---------|
| ACC      | Glutathione    | 0.19    | 0.96    |
| ACC      | GABA           | 0.66    | 0.96    |
| ACC      | Glutamate      | 0.32    | 0.96    |
| ACC      | Glutamine      | 0.53    | 0.96    |
| ACC      | total Choline  | 0.67    | 0.96    |
| ACC      | Lactate        | 0.35    | 0.96    |
| ACC      | Myo-inositol   | 0.57    | 0.96    |
| ACC      | NAA            | 0.52    | 0.96    |
| ACC      | NAAG           | 0.74    | 0.96    |
| ACC      | total Creatine | 0.80    | 0.96    |
| DLPFC    | Glutathione    | 0.67    | 0.96    |
| DLPFC    | GABA           | 0.95    | 0.96    |
| DLPFC    | Glutamate      | 0.71    | 0.96    |
| DLPFC    | Glutamine      | 0.86    | 0.96    |
| DLPFC    | total Choline  | 0.89    | 0.96    |
| DLPFC    | Lactate        | 0.88    | 0.96    |
| DLPFC    | Myo-inositol   | 0.92    | 0.96    |
| DLPFC    | NAA            | 0.75    | 0.96    |
| DLPFC    | NAAG           | 0.62    | 0.96    |
| DLPFC    | total Creatine | 0.89    | 0.96    |
| Thalamus | Glutathione    | 0.36    | 0.96    |
| Thalamus | GABA           | 0.55    | 0.96    |
| Thalamus | Glutamate      | 0.62    | 0.96    |
| Thalamus | Glutamine      | 0.58    | 0.96    |
| Thalamus | total Choline  | 0.84    | 0.96    |
| Thalamus | Lactate        | 0.36    | 0.96    |
| Thalamus | Myo-inositol   | 0.37    | 0.96    |
| Thalamus | NAA            | 0.71    | 0.96    |
| Thalamus | NAAG           | 0.66    | 0.96    |
| Thalamus | total Creatine | 0.49    | 0.96    |

(continued on next page)

|                   |                |      |      |
|-------------------|----------------|------|------|
| Centrum semiovale | Glutathione    | 0.91 | 0.96 |
| Centrum semiovale | GABA           | 0.60 | 0.96 |
| Centrum semiovale | Glutamate      | 0.50 | 0.96 |
| Centrum semiovale | Glutamine      | 0.53 | 0.96 |
| Centrum semiovale | total Choline  | 0.84 | 0.96 |
| Centrum semiovale | Lactate        | 0.70 | 0.96 |
| Centrum semiovale | Myo-inositol   | 0.74 | 0.96 |
| Centrum semiovale | NAA            | 0.39 | 0.96 |
| Centrum semiovale | NAAG           | 0.87 | 0.96 |
| Centrum semiovale | total Creatine | 0.85 | 0.96 |
| OFR               | Glutathione    | 0.79 | 0.96 |
| OFR               | GABA           | 0.66 | 0.96 |
| OFR               | Glutamate      | 0.52 | 0.96 |
| OFR               | Glutamine      | 0.35 | 0.96 |
| OFR               | total Choline  | 0.88 | 0.96 |
| OFR               | Lactate        | 0.74 | 0.96 |
| OFR               | Myo-inositol   | 0.79 | 0.96 |
| OFR               | NAA            | 0.39 | 0.96 |
| OFR               | NAAG           | 0.70 | 0.96 |
| OFR               | total Creatine | 0.97 | 0.97 |

**Table S4. Analysis results for tissue fractions**

We examined annual percentage changes (denoted as % in the table) of tissue fractions and didn't observe significant changes over time. Abbreviations: ACC, anterior cingulate cortex; DLPFC, dorsolateral prefrontal cortex; OFR, orbital frontal cortex.

| region            | tissue fraction     | % (patient) | % (control) | p-value<br>(patient vs control) | q-value<br>(patient vs control) |
|-------------------|---------------------|-------------|-------------|---------------------------------|---------------------------------|
| ACC               | Grey matter         | 0.38        | -0.31       | 0.60                            | 0.82                            |
| ACC               | White matter        | -0.56       | 0.47        | 0.30                            | 0.82                            |
| ACC               | Cerebrospinal fluid | 0.19        | -0.16       | 0.57                            | 0.82                            |
| Centrum semiovale | Grey matter         | 1.09        | -0.88       | 0.31                            | 0.82                            |
| Centrum semiovale | White matter        | -1.18       | 0.96        | 0.31                            | 0.82                            |
| Centrum semiovale | Cerebrospinal fluid | 0.09        | -0.07       | 0.54                            | 0.82                            |
| DLPFC             | Grey matter         | 0.23        | -0.18       | 0.72                            | 0.90                            |
| DLPFC             | White matter        | -0.70       | 0.55        | 0.43                            | 0.82                            |
| DLPFC             | Cerebrospinal fluid | 0.47        | -0.37       | 0.48                            | 0.82                            |
| OFR               | Grey matter         | 0.03        | -0.03       | 0.98                            | 0.98                            |
| OFR               | White matter        | 0.05        | -0.04       | 0.97                            | 0.98                            |
| OFR               | Cerebrospinal fluid | -0.09       | 0.07        | 0.41                            | 0.82                            |
| Thalamus          | Grey matter         | -0.45       | 0.35        | 0.58                            | 0.82                            |
| Thalamus          | White matter        | -0.09       | 0.07        | 0.92                            | 0.98                            |
| Thalamus          | Cerebrospinal fluid | 0.54        | -0.43       | 0.26                            | 0.82                            |

**Table S5. Analysis results for group comparison of longitudinal changes between patients with non-affective and affective psychosis**

We compared the annual percentage changes and didn't observe any significant differences between patients with non-affective and affective psychosis in any brain metabolites in any brain region. Abbreviations: GABA,  $\gamma$ -aminobutyric acid; NAA, N-acetylaspartate; NAAG, N-acetylaspartyl glutamate; ACC, anterior cingulate cortex; DLPFC, dorsolateral prefrontal cortex; and OFR, orbital frontal cortex.

| region   | metabolite     | p-value | q-value |
|----------|----------------|---------|---------|
| ACC      | Glutathione    | 0.32    | 0.90    |
| ACC      | GABA           | 0.82    | 0.96    |
| ACC      | Glutamate      | 0.82    | 0.96    |
| ACC      | Glutamine      | 0.35    | 0.90    |
| ACC      | total Choline  | 0.31    | 0.90    |
| ACC      | Lactate        | 0.59    | 0.96    |
| ACC      | Myo-inositol   | 0.95    | 0.98    |
| ACC      | NAA            | 0.04    | 0.79    |
| ACC      | NAAG           | 0.49    | 0.96    |
| ACC      | total Creatine | 0.46    | 0.96    |
| DLPFC    | Glutathione    | 0.79    | 0.96    |
| DLPFC    | GABA           | 0.81    | 0.96    |
| DLPFC    | Glutamate      | 0.63    | 0.96    |
| DLPFC    | Glutamine      | 0.09    | 0.79    |
| DLPFC    | total Choline  | 0.93    | 0.98    |
| DLPFC    | Lactate        | 0.13    | 0.79    |
| DLPFC    | Myo-inositol   | 0.22    | 0.90    |
| DLPFC    | NAA            | 0.12    | 0.79    |
| DLPFC    | NAAG           | 0.40    | 0.90    |
| DLPFC    | total Creatine | 0.65    | 0.96    |
| Thalamus | Glutathione    | 0.84    | 0.96    |
| Thalamus | GABA           | 0.94    | 0.98    |
| Thalamus | Glutamate      | 0.82    | 0.96    |
| Thalamus | Glutamine      | 0.35    | 0.90    |
| Thalamus | total Choline  | 0.97    | 0.98    |
| Thalamus | Lactate        | 0.87    | 0.97    |
| Thalamus | Myo-inositol   | 0.25    | 0.90    |
| Thalamus | NAA            | 0.82    | 0.96    |
| Thalamus | NAAG           | 0.63    | 0.96    |
| Thalamus | total Creatine | 0.41    | 0.90    |

(continued on next page)



|                   |                |      |      |
|-------------------|----------------|------|------|
| Centrum semiovale | Glutathione    | 0.25 | 0.90 |
| Centrum semiovale | GABA           | 0.71 | 0.96 |
| Centrum semiovale | Glutamate      | 0.79 | 0.96 |
| Centrum semiovale | Glutamine      | 0.58 | 0.96 |
| Centrum semiovale | total Choline  | 0.37 | 0.90 |
| Centrum semiovale | Lactate        | 0.30 | 0.90 |
| Centrum semiovale | Myo-inositol   | 0.12 | 0.79 |
| Centrum semiovale | NAA            | 0.80 | 0.96 |
| Centrum semiovale | NAAG           | 0.81 | 0.96 |
| Centrum semiovale | total Creatine | 0.53 | 0.96 |
| OFR               | Glutathione    | 0.34 | 0.90 |
| OFR               | GABA           | 0.41 | 0.90 |
| OFR               | Glutamate      | 0.18 | 0.90 |
| OFR               | Glutamine      | 0.99 | 0.99 |
| OFR               | total Choline  | 0.08 | 0.79 |
| OFR               | Lactate        | 0.63 | 0.96 |
| OFR               | Myo-inositol   | 0.28 | 0.90 |
| OFR               | NAA            | 0.71 | 0.96 |
| OFR               | NAAG           | 0.01 | 0.23 |
| OFR               | total Creatine | 0.07 | 0.79 |

**Table S6. Impact of confounding factors on annual percentage changes of metabolites in the anterior cingulate cortex (ACC) in the first episode psychosis patient group.**

In the analysis comparing patients and controls, we adjusted for the confounding effects of age, gender, race, and smoking status. The patient group may be influenced by intrinsic factors (such as duration of illness, and positive and negative symptoms) and extrinsic factors (such as medications), which cannot be adjusted in two-group comparisons since they don't apply to controls. To evaluate the impact of these factors, including demographic variates, we performed linear regressions with gender and race (which don't change over time) as covariates. Q values (p values corrected for multiple comparison correction) were used to measure the statistical significance of impacts. Abbreviations: GABA,  $\gamma$ -aminobutyric acid; NAA, N-acetylaspartate; DOI, duration of illness; CPZ, chlorpromazine equivalent dose; SANS, the scale of the assessment for negative symptoms; and SAPS, the scale for the assessment of positive symptoms.

**(A) associations between confounding factors and APCs of glutamate in ACC**

| <b>Confounding factors</b> | <b>t-value</b> | <b>p-value</b> | <b>q-value</b> |
|----------------------------|----------------|----------------|----------------|
| DOI                        | -2.24          | 0.04           | 0.38           |
| mood stabilizer (baseline) | -1.99          | 0.06           | 0.38           |
| CPZ (cumulative)           | 1.74           | 0.10           | 0.40           |
| SANS                       | -1.53          | 0.15           | 0.43           |
| CPZ (baseline)             | 1.30           | 0.21           | 0.43           |
| smoke                      | 1.28           | 0.22           | 0.43           |
| antidepressants (baseline) | 1.20           | 0.25           | 0.43           |
| SAPS                       | -0.84          | 0.41           | 0.62           |
| mood stabilizer (change)   | 0.61           | 0.55           | 0.67           |
| age                        | -0.60          | 0.56           | 0.67           |
| diagnosis                  | -0.44          | 0.67           | 0.73           |
| antidepressants (change)   | -0.23          | 0.82           | 0.82           |

**(B) associations between confounding factors and APCs of GABA in ACC**

| <b>Confounding factors</b> | <b>t-value</b> | <b>p-value</b> | <b>q-value</b> |
|----------------------------|----------------|----------------|----------------|
| antidepressants (baseline) | 1.88           | 0.08           | 0.54           |
| DOI                        | -1.75          | 0.10           | 0.54           |
| CPZ (cumulative)           | 1.26           | 0.23           | 0.54           |
| SANS                       | -1.25          | 0.23           | 0.54           |
| smoke                      | 1.14           | 0.27           | 0.54           |
| SAPS                       | -1.06          | 0.31           | 0.54           |
| diagnosis                  | -1.04          | 0.32           | 0.54           |
| antidepressants (change)   | -0.88          | 0.39           | 0.59           |
| mood stabilizer (baseline) | -0.64          | 0.53           | 0.67           |
| age                        | -0.60          | 0.56           | 0.67           |
| mood stabilizer (change)   | -0.44          | 0.66           | 0.73           |
| CPZ (baseline)             | -0.17          | 0.87           | 0.87           |

**(C)** associations between confounding factors and APCs of NAA in ACC

| <b>Confounding factors</b> | <b>t-value</b> | <b>p-value</b> | <b>q-value</b> |
|----------------------------|----------------|----------------|----------------|
| CPZ (cumulative)           | 3.04           | 0.01           | 0.05           |
| DOI                        | -3.01          | 0.01           | 0.05           |
| antidepressants (baseline) | 1.36           | 0.19           | 0.64           |
| SANS                       | -1.05          | 0.31           | 0.64           |
| smoke                      | 0.92           | 0.37           | 0.64           |
| CPZ (baseline)             | -0.90          | 0.38           | 0.64           |
| mood stabilizer (baseline) | -0.87          | 0.40           | 0.64           |
| mood stabilizer (change)   | 0.80           | 0.44           | 0.64           |
| diagnosis                  | -0.72          | 0.48           | 0.64           |
| age                        | 0.43           | 0.67           | 0.80           |
| antidepressants (change)   | 0.26           | 0.80           | 0.83           |
| SAPS                       | -0.22          | 0.83           | 0.83           |

**(D)** associations between confounding factors and APCs of myo-inositol in ACC

| <b>Confounding factors</b> | <b>t-value</b> | <b>p-value</b> | <b>q-value</b> |
|----------------------------|----------------|----------------|----------------|
| mood stabilizer (baseline) | -2.90          | 0.01           | 0.13           |
| SANS                       | -2.12          | 0.05           | 0.30           |
| antidepressants (change)   | 1.19           | 0.25           | 0.61           |
| age                        | -1.06          | 0.30           | 0.61           |
| antidepressants (baseline) | -1.01          | 0.33           | 0.61           |
| diagnosis                  | 1.00           | 0.33           | 0.61           |
| smoke                      | -0.96          | 0.35           | 0.61           |
| CPZ (cumulative)           | 0.66           | 0.52           | 0.77           |
| CPZ (baseline)             | -0.26          | 0.80           | 0.97           |
| SAPS                       | -0.20          | 0.84           | 0.97           |
| DOI                        | 0.07           | 0.95           | 0.97           |
| mood stabilizer (change)   | -0.04          | 0.97           | 0.97           |

**(E)** associations between confounding factors and APCs of total choline in ACC

| <b>Confounding factors</b> | <b>t-value</b> | <b>p-value</b> | <b>q-value</b> |
|----------------------------|----------------|----------------|----------------|
| SANS                       | -2.13          | 0.05           | 0.64           |
| diagnosis                  | -1.16          | 0.27           | 0.80           |
| antidepressants (baseline) | 1.00           | 0.33           | 0.80           |
| DOI                        | -0.82          | 0.43           | 0.80           |
| mood stabilizer (baseline) | -0.66          | 0.52           | 0.80           |
| antidepressants (change)   | -0.60          | 0.56           | 0.80           |
| age                        | 0.58           | 0.57           | 0.80           |
| SAPS                       | 0.54           | 0.60           | 0.80           |
| CPZ (cumulative)           | 0.53           | 0.60           | 0.80           |
| CPZ (baseline)             | -0.31          | 0.77           | 0.90           |
| smoke                      | 0.22           | 0.83           | 0.90           |
| mood stabilizer (change)   | -0.13          | 0.90           | 0.90           |

**(F)** associations between confounding factors and APCs of total creatine in ACC

| <b>Confounding factors</b> | <b>t-value</b> | <b>p-value</b> | <b>q-value</b> |
|----------------------------|----------------|----------------|----------------|
| SANS                       | -1.64          | 0.12           | 0.85           |
| mood stabilizer (baseline) | -1.51          | 0.15           | 0.85           |
| CPZ (cumulative)           | 0.82           | 0.42           | 0.85           |
| DOI                        | -0.81          | 0.43           | 0.85           |
| age                        | -0.75          | 0.46           | 0.85           |
| antidepressants (baseline) | -0.53          | 0.61           | 0.85           |
| smoke                      | -0.49          | 0.63           | 0.85           |
| CPZ (baseline)             | 0.43           | 0.67           | 0.85           |
| SAPS                       | -0.31          | 0.76           | 0.85           |
| antidepressants (change)   | -0.29          | 0.77           | 0.85           |
| mood stabilizer (change)   | 0.22           | 0.83           | 0.85           |
| diagnosis                  | 0.20           | 0.85           | 0.85           |

## Figure legends

### Figure S1. Boxplots of the metabolite levels in the Anterior Cingulate Cortex.

Significant longitudinal reductions were observed in glutamate (A) in both patients and controls, while for  $\gamma$ -aminobutyric acid (GABA) (B), N-acetylaspartate (NAA) (C), *myo*-inositol (D), total choline (E), and total creatine (F), significant longitudinal reductions were observed only in patients, but not in controls.

Metabolite levels were calculated relative to the unsuppressed voxel water and are expressed in institutional units (IU, approximately millimolar). The box represents the standard deviation and the solid line in the middle of the box shows the mean value of the metabolite level. The x-axis is visits, where V1, V2, and V3 are the first (baseline), second, and third annual visits, respectively.

### Figure S2. Boxplots of the metabolite levels in Glutathione.

We didn't observe significant longitudinal changes in glutathione in anterior cingulate cortex (ACC) (A), thalamus (B), dorsolateral prefrontal cortex (DLPFC) (C), centrum semiovale (D), or orbital frontal cortex (OFR) (E).

Metabolite levels were calculated relative to the unsuppressed voxel water and are expressed in institutional units (IU, approximately millimolar). The box represents the standard deviation and the solid line in the middle of the box shows the mean value of the metabolite level. The x-axis is visits, where V1, V2, and V3 are the first (baseline), second, and third annual visits, respectively.

**Figure S1**

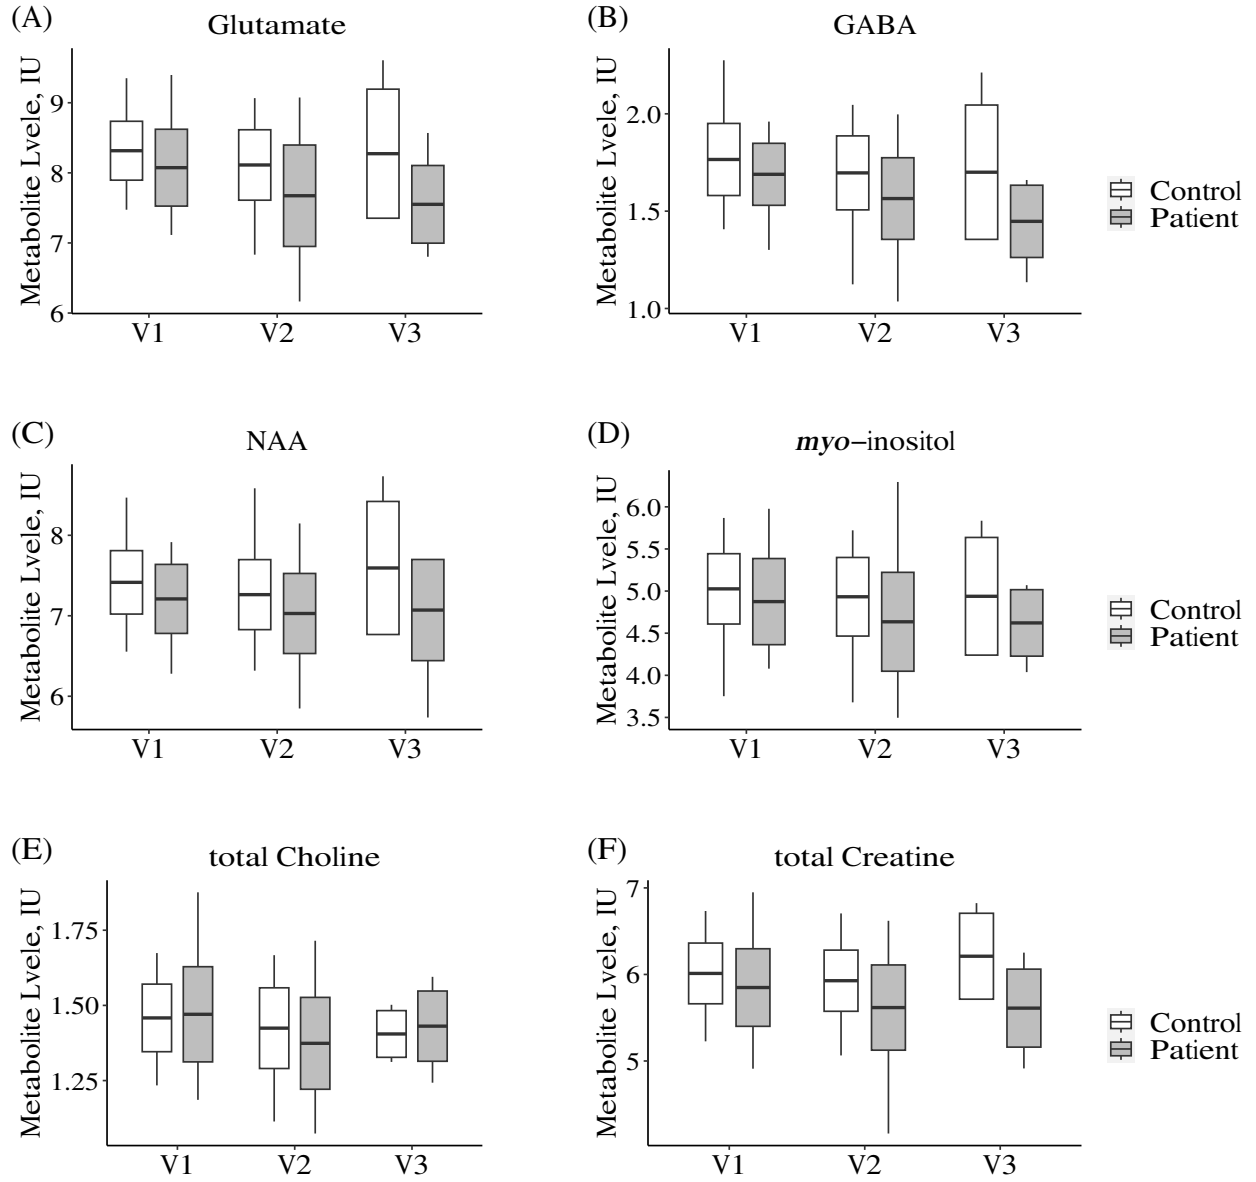

**Figure S2**

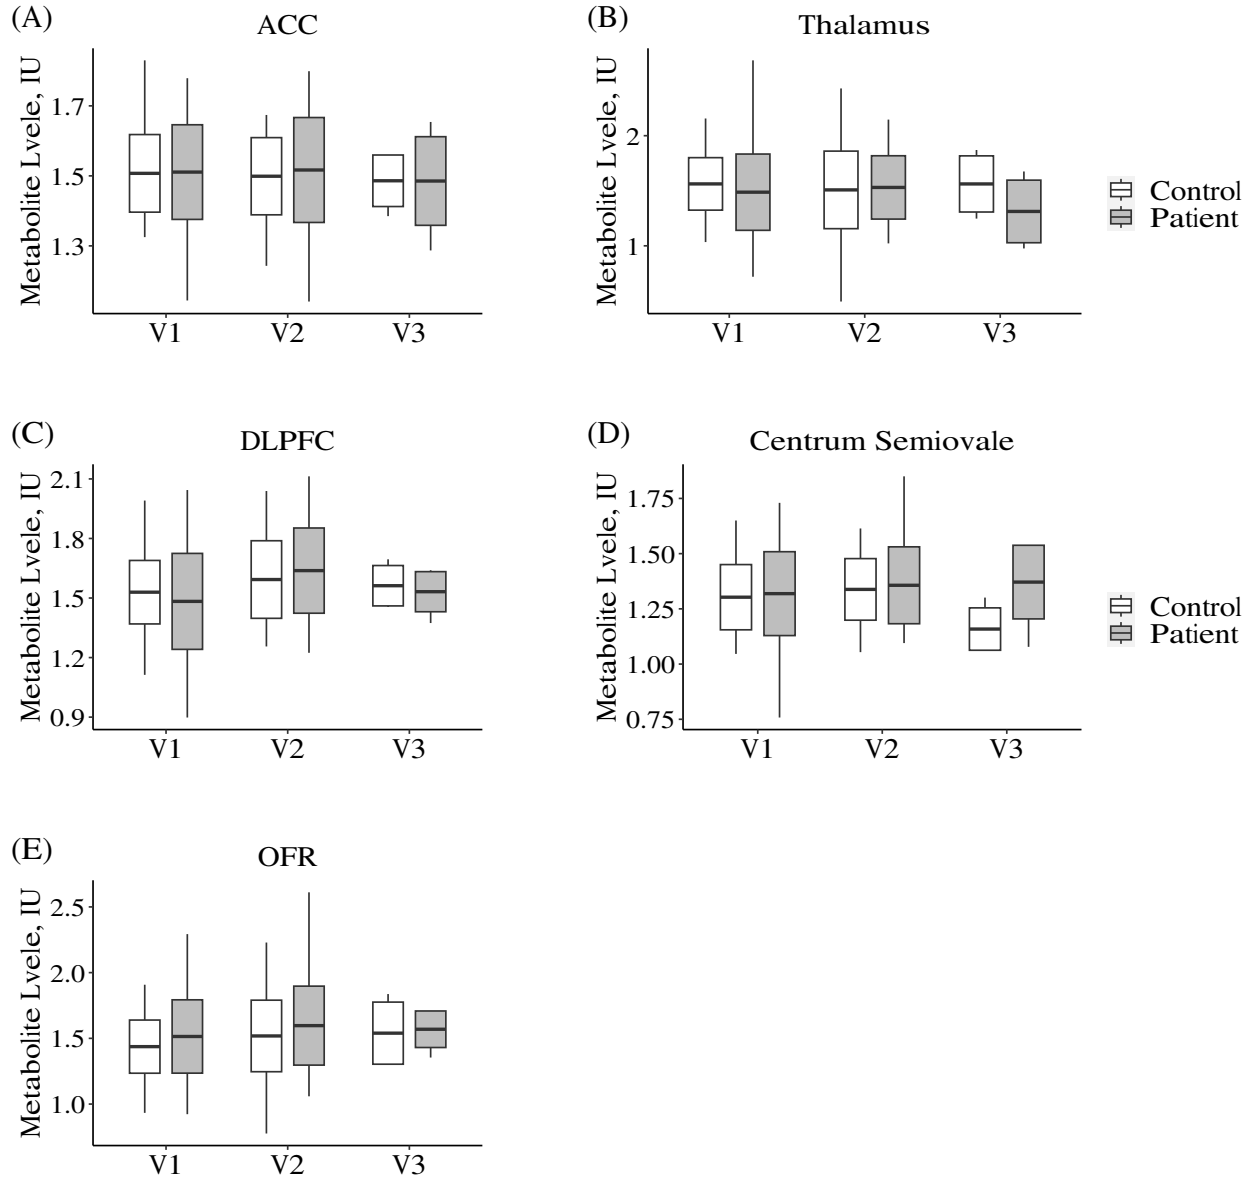

Supplement: NIHMS1871368-supplement-1871368_Sup_Info.pdf [file NIHMS1871368-supplement-1871368_Sup_Info.pdf]
